# Supplementary material
Source: Springer Nature journal article supplement (https://www.springermedizin.de/resource/supplementary/13054_2009_8406_MOESM7_ESM.pdf/9731896)

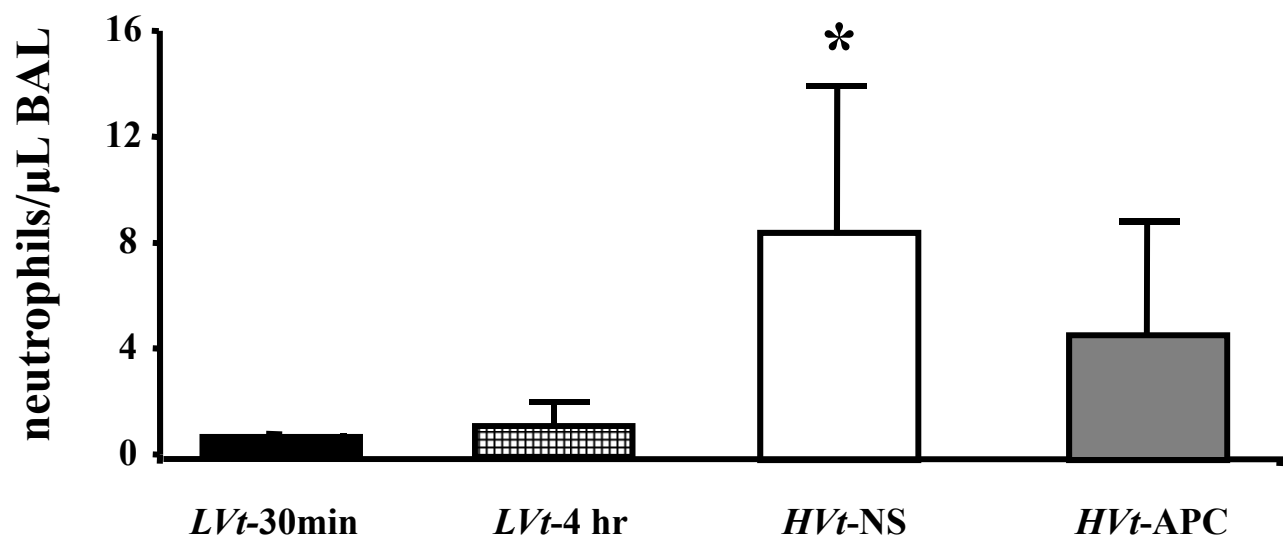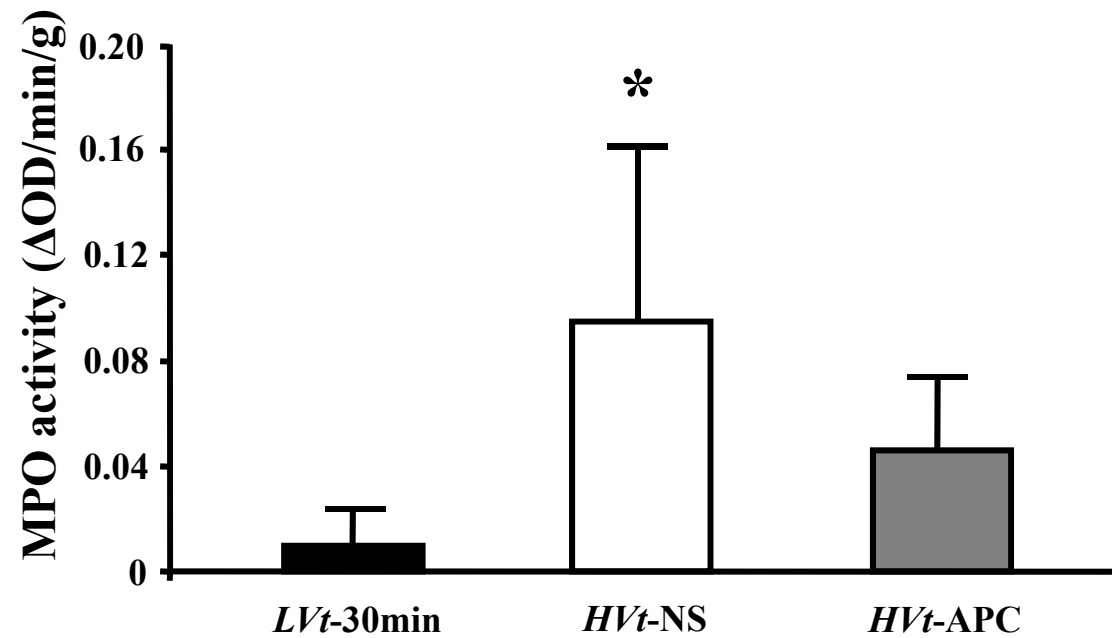

Supplement: MOESM7 [file 9731896]
